# Supplementary material for: MYD88 and Proinflammatory Chemokines in Aortic Atheromatosis: Exploring Novel Statin Effects
Source: MDPI journal article supplement (doi:10.3390/ijms24119248), 2023-05-25
Supplement: s1 [file s1]

**Supplementary Table S1.** Primer sequences.

| <b>Rabbit<br/>Target<br/>Gene</b> | <b>Forward Primer</b>       | <b>Reverse Primer</b>            | <b>Target<br/>Size</b> | <b>NM</b>        |
|-----------------------------------|-----------------------------|----------------------------------|------------------------|------------------|
| <b>b actin</b>                    | CCATGTACGTGGCCAT<br>CCAG    | TCTTCATGAGGTAGTC<br>GGTCAGGTC    | 148nts                 | NM_00110168<br>3 |
| <b>MYD88</b>                      | CCCTTTGTCTCTCGAC<br>TCTTGG  | TACGAGAACAGCCAC<br>TGCCC         | 125nts                 | Trace Archive    |
| <b>NF-<math>\kappa</math>B</b>    | ATGCCAATGCCCTCTT<br>CGACT   | CGTGACTTCCAGCAG<br>ATCCCT        | 122nts                 | Trace Archive    |
| <b>CCL4</b>                       | GAGACCACCAGCCTC<br>TGCTC    | TCAGTTCAGTTCCAAG<br>TCATCCAC     | 123nts                 | NM_00108219<br>6 |
| <b>CCL20</b>                      | TATCGTGGGCTTCACA<br>CAGC    | CCATTCCTTCTTCGGA<br>TCTGC        | 115nts                 | Trace Archive    |
| <b>CCR2</b>                       | GGTTGCTGAGAAGCC<br>TGACACGC | CAGGTCTGTATTCTTC<br>AACAAGCCCTCG | 125nts                 | Trace Archive    |
| <b>IFN<math>\beta</math></b>      | TCCAACCTATGGCACG<br>GAAGTCT | TTCTGGAGCTGTTGTG<br>GTTCT        | 133nts                 | XM_00270796<br>8 |
| <b>IFN<math>\gamma</math></b>     | TGCCAGGACACACTA<br>ACCAGAG  | TGTCACCTCTCCTCTTT<br>CCAATTCC    | 127nts                 | NM_00108199<br>1 |

|              |                            |                               |        |                  |
|--------------|----------------------------|-------------------------------|--------|------------------|
| <b>TNF-a</b> | CTGCACTTCAGGGTGA<br>TCG    | CTACGTGGGCTAGAG<br>GCTTG      | 133nts | NM_00108226<br>3 |
| <b>IL-1b</b> | TTGAAGAAGAACCCG<br>TCCTCTG | CTCATACGTGCCAGAC<br>AACACC    | 128nts | NM_00108220<br>1 |
| <b>IL-2</b>  | GCCCAAGAAGGTCAC<br>AGAATTG | TGCTGATTGATTCTCT<br>GGTATTTCC | 128nts | NM_00116318<br>0 |
| <b>IL-4</b>  | CGACATCATCCTACCC<br>GAAGTC | CCTCTCTCTCGGTTGT<br>GTTCTTG   | 122nts | NM_00116317<br>7 |
| <b>IL-8</b>  | CCACACCTTTCCATCC<br>CAAAT  | CTTCTGCACCCACTTT<br>TCCTTG    | 122nts | NM_00108229<br>3 |
| <b>IL10</b>  | CTTTGGCAGGGTGAA<br>GACTTTC | ACTGGATCATCTCCGA<br>CAAGG     | 126nts | NM_00108204<br>5 |
| <b>IL-18</b> | ACCAAGGACAGCAAC<br>CTGTGTT | ACAGAGAGGCTTACA<br>GCCATGC    | 120nts | NM_00112294<br>0 |

*b actin; Myeloid differentiation primary response 88 (MYD88); Nuclear factor kappa-light-chain-enhancer of activated B cells (NF-κB); C-C chemokine ligand (CCL4); Chemokine (C-C motif) ligand 20 (CCL20); C-C chemokine receptor type 2 (CCR2); Interferon beta (IFN-β); Interferon gamma (IFN-γ); tumor necrosis factor alpha (TNF-α); interleukin 1b (IL-1b); interleukin 2 (IL-2); interleukin 4 (IL-4); interleukin 8 (IL-8); interleukin 10 (IL-10); interleukin 18 (IL-18).*
